# Supplementary material for: In vivo bioluminescence imaging of natural bacteria within deep tissues via ATP-binding cassette sugar transporter
Source: Springer Nature journal article supplement (doi:10.1038/s41467-023-37827-9), 2023-04-22
Supplement: MOESM1 [file 41467_2023_37827_MOESM1_ESM.pdf]

## Supporting Information

### ***In vivo* bioluminescence imaging of natural bacteria within deep tissues via ATP-binding cassette sugar transporter**

Qian Zhang,<sup>1,‡</sup> Bin Song,<sup>1,‡</sup> Yanan Xu,<sup>1,‡</sup> Yunmin Yang,<sup>1</sup> Jian Ji,<sup>2</sup> Wenjun Cao,<sup>2</sup>  
Jianping Lu,<sup>1</sup> Jiali Ding,<sup>1</sup> Haiting Cao,<sup>1</sup> Binbin Chu,<sup>1</sup> Jiaxu Hong,<sup>2,\*</sup> Houyu Wang<sup>1,\*</sup> &  
Yao He<sup>1,\*</sup>

<sup>1</sup>Suzhou Key Laboratory of Nanotechnology and Biomedicine, Institute of Functional Nano & Soft Materials & Collaborative Innovation Center of Suzhou Nano Science and Technology (NANO-CIC), Soochow University, Suzhou 215123, China

<sup>2</sup>Department of Ophthalmology and Vision Science, Shanghai Eye, Ear, Nose and Throat Hospital, Fudan University, Shanghai, China.

\*Corresponding authors. Email: [jiaxu.hong@fdeent.org](mailto:jiaxu.hong@fdeent.org); [houyuwang@suda.edu.cn](mailto:houyuwang@suda.edu.cn); [yaohe@suda.edu.cn](mailto:yaohe@suda.edu.cn)

<sup>‡</sup> These authors contributed equally.

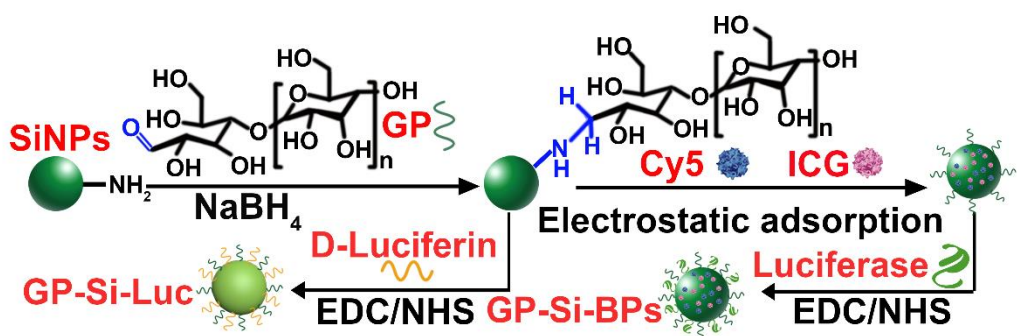

**Supplementary Fig. 1.** A scheme illustrating the synthesis of GP, Cy5, ICG and luciferase-modified silicon nanoparticles (SiNPs) (GP-Si-BPs) and the synthesis of GP, D-luciferin-modified SiNPs (GP-Si-Luc) step by step.

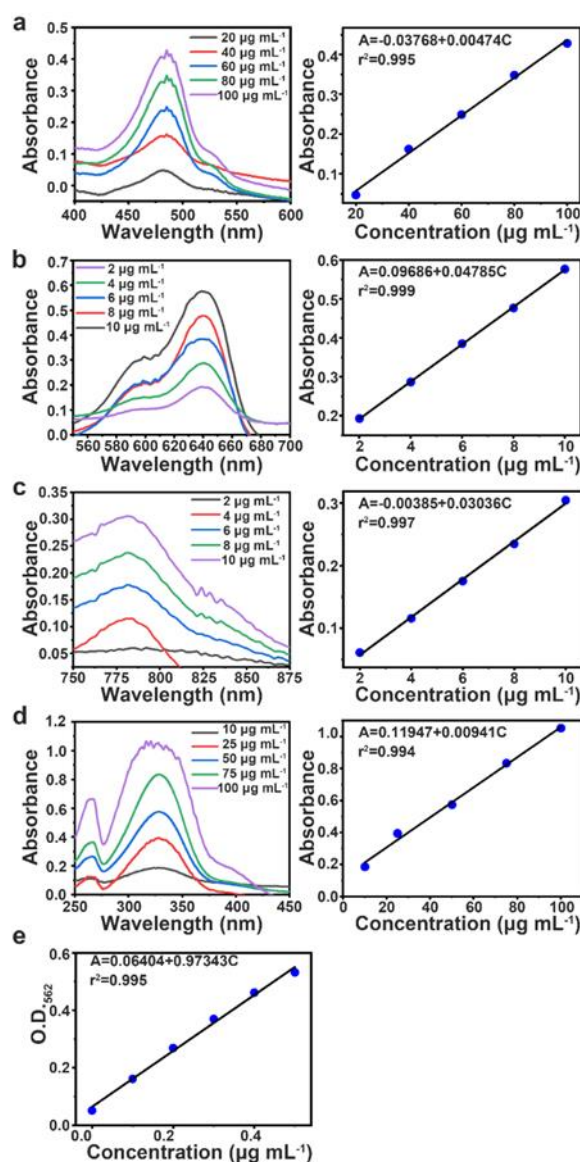

**Supplementary Fig. 2. Quantification curves of GP, Cy5, ICG, D-Luciferin and Luciferase.** **a**, UV-vis absorption spectra of GP with various concentrations ranged from 20 to 100  $\mu\text{g mL}^{-1}$  and corresponding calibration curve. **b**, UV-vis absorption spectra of Cy5 with various concentrations ranged from 2 to 10  $\mu\text{g mL}^{-1}$  and corresponding calibration curve. **c**, UV-vis absorption spectra of ICG with various concentrations ranged from 2 to 10  $\mu\text{g mL}^{-1}$  and corresponding calibration curve. **d**, UV-vis absorption spectra of D-luciferin with various concentrations ranged from 10 to 100  $\mu\text{g mL}^{-1}$  and corresponding calibration curve. **e**, Calibration curve of luciferase protein using the BCA assay. Error bars represent the standard deviation obtained from three independent measurements. Source data are provided as a Source data file.

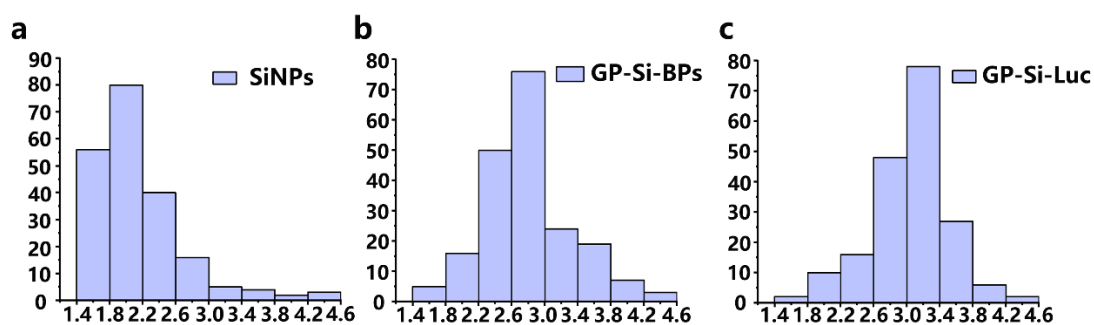

**Supplementary Fig. 3. The size distribution of nanoparticles.** **a**, Size distribution of SiNPs. **b**, Size distribution of GP-Si-BPs. **c**, Size distribution of GP-Si-Luc. The size distribution data were obtained by measuring 200 particles in corresponding TEM images (**Fig. 2a**). Accordingly, the average diameter of GP-Si-BPs was  $\sim 2.8$  nm and the average diameter of GP-Si-Luc was  $\sim 2.9$  nm, both of which was slightly larger than that of naked SiNPs (e.g.,  $\sim 2.2$  nm). Source data are provided as a Source data file.

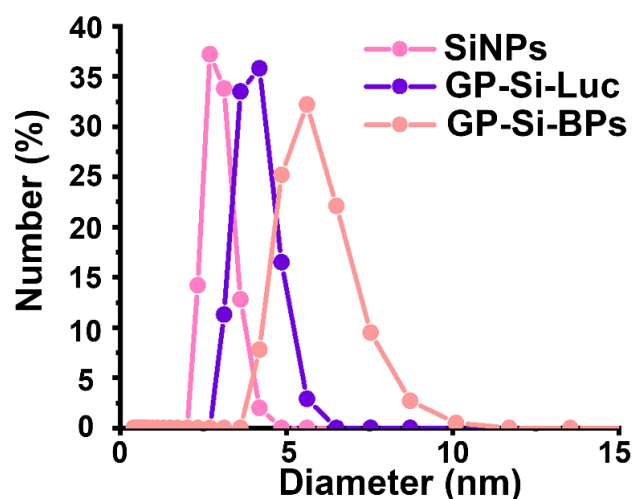

**Supplementary Fig. 4. The DLS analysis of SiNPs, GP-Si-Luc and GP-Si-BPs.** The DLS was performed using a DynaPro DLS, which was made by Malvern Corp, U.K. (ZEN3690). One mL of GP-Si-BPs, GP-Si-Luc or pure SiNPs sample was transferred into an exclusive vitreous for DLS measurements. Experiment parameters were as follows: scan times: 100; dispersant: water; temperature: 25°C; viscosity: 0.8872 cP; RI: 1.330; and dielectric constant: 78.5. Accordingly, the hydrodynamic diameter of GP-Si-BPs, GP-Si-Luc and pure SiNPs measured by DLS was ~ 5.6 nm, ~ 4.1 nm and ~ 3.1 nm. Source data are provided as a Source data file.

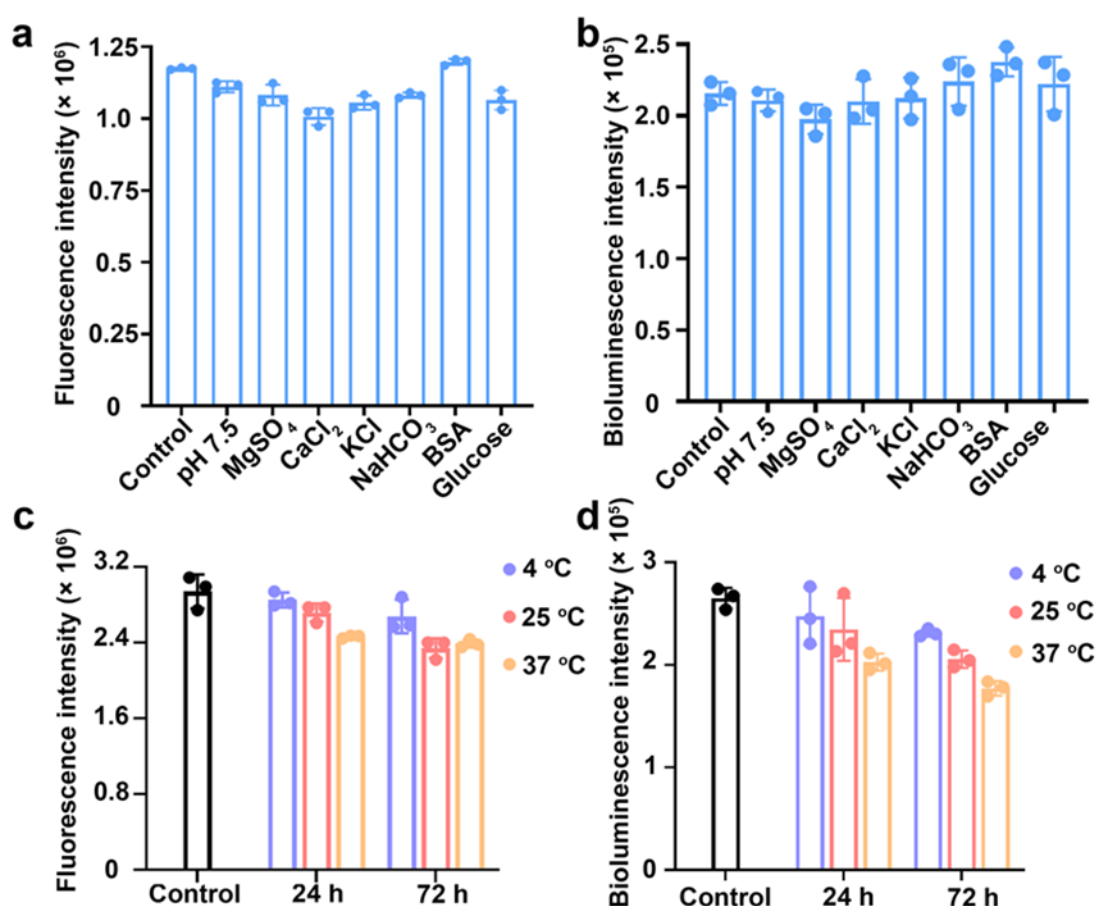

**Supplementary Fig. 5. Stability test of GP-Si-BPs in nanoagents.** **a**, The fluorescence intensity of ICG in GP-Si-BPs tested in various kinds of solutions with pH 7.5, as well as different kinds of solutions containing various intracellular species (e.g., 2 mM  $\text{MgSO}_4$ , 2 mM  $\text{CaCl}_2$ , 150 mM KCl, 10 mM  $\text{NaHCO}_3$ , 20 mM glucose and 1 mM bovine serum albumin (BSA)) (mean  $\pm$  SD,  $n = 3$ ). **b**, The bioluminescence intensity of GP-Si-BPs in nanoagents is tested in various kinds of solutions with pH 7.5, as well as different kinds of solutions containing various intracellular species (e.g., 2 mM  $\text{MgSO}_4$ , 2 mM  $\text{CaCl}_2$ , 150 mM KCl, 10 mM  $\text{NaHCO}_3$ , 20 mM glucose and 1 mM bovine serum albumin (BSA)) (mean  $\pm$  SD,  $n = 3$ ). **c**, The fluorescence intensity of GP-Si-BPs in PBS after storing at varied temperatures for 24 hours and for 72 hours (mean  $\pm$  SD,  $n = 3$ ). **d**, The bioluminescence intensity of GP-Si-BPs in PBS after storing at varied temperatures for 24 hours and for 72 hours (mean  $\pm$  SD,  $n = 3$ ). All error bars represent the standard deviation determined from three independent assays. Source data are provided as a Source Data file.

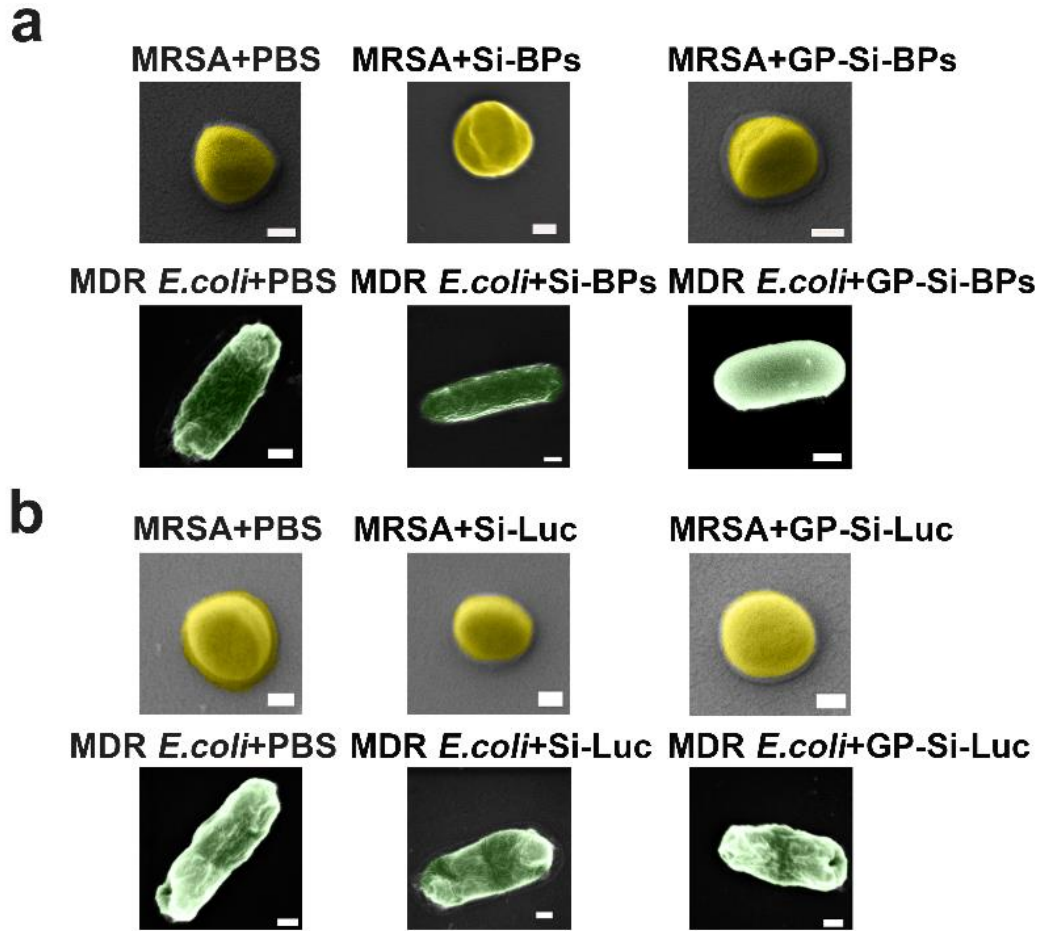

**Supplementary Fig. 6. SEM images of bacteria treated with Trojan BLI probes. a,** SEM images of MRSA or MDR *E. coli* treated by PBS (control), 0.06 mM of Si-BPs or GP-Si-BPs at 37 °C for 2.5 h. After incubation, the treated bacteria were rinsed with PBS buffer for several times. Scale bar, 200 nm. All imaging experiments were repeated three times with similar results. **b,** SEM images of MRSA or MDR *E. coli* treated by PBS (control), 0.06 mM of Si-Luc or GP-Si-Luc at 37 °C for 2.5 h. After incubation, the treated bacteria were rinsed with PBS buffer for several times. The bacterial cell concentration was  $\sim 1.0 \times 10^7$  CFU. Scale bar, 200 nm. All imaging experiments were repeated three times with similar results.

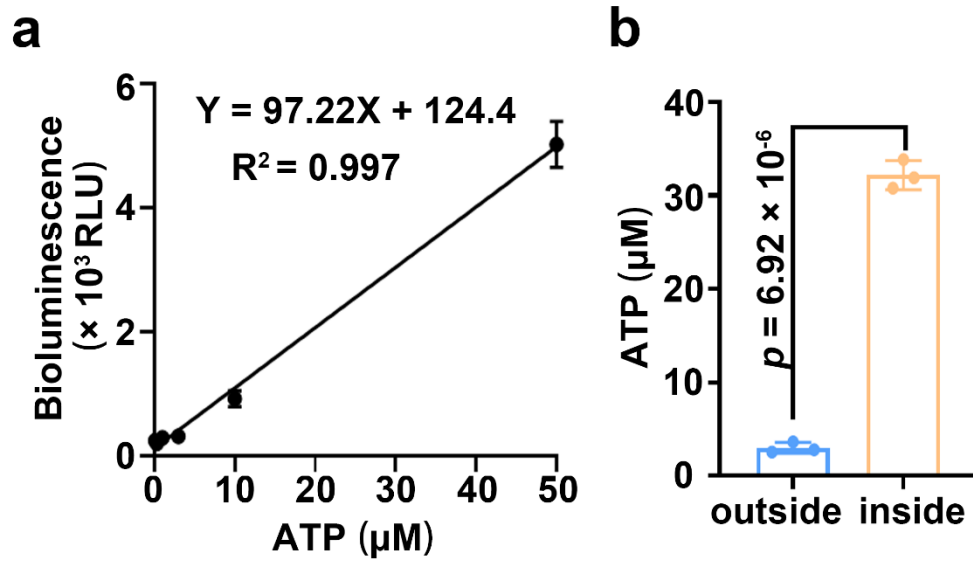

**Supplementary Fig. 7. Comparison of ATP contents inside bacteria and outside bacteria determined by ATP assay kit. a**, Linear correlation between luminescence intensities and ATP concentrations in ATP kit assay. **b**, Comparison of ATP contents inside MDR *E. coli* and outside MDR *E. coli*. After centrifuging the bacterial solution, the ATP kit was used to measure the bioluminescence intensity of the supernatant and the bacterial solution after equal volume PBS re-selection, and then inserted the detected bioluminescence intensity into the linear regression equation in **Supplementary Fig. 7a** to calculate the ATP content. The bacterial cell concentration was  $\sim 1.0 \times 10^7$  CFU. Statistical analysis was performed using a one-way ANOVA analysis (mean  $\pm$  SD,  $n = 3$ ). Error bars represent the standard deviation obtained from three independent measurements. Source data are provided as a Source data file.



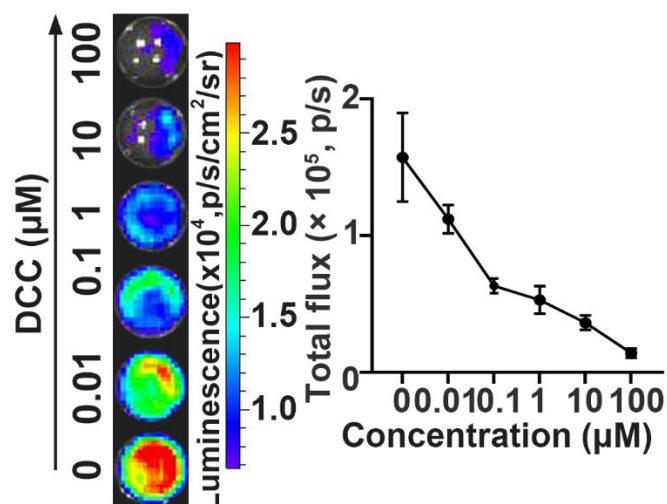

**Supplementary Fig. 8.** Attenuation of the luminescence at 0.06 mM GP-Si-BPs in the presence of 0.06 mM GP-Si-Luc by addition of the ATP inhibitor of dicyclohexylcarbodiimide (DCC). All imaging experiments were repeated three times with similar results (mean  $\pm$  SD,  $n = 3$ ). Error bars represent the standard deviation obtained from three independent measurements. Source data are provided as a Source data file.

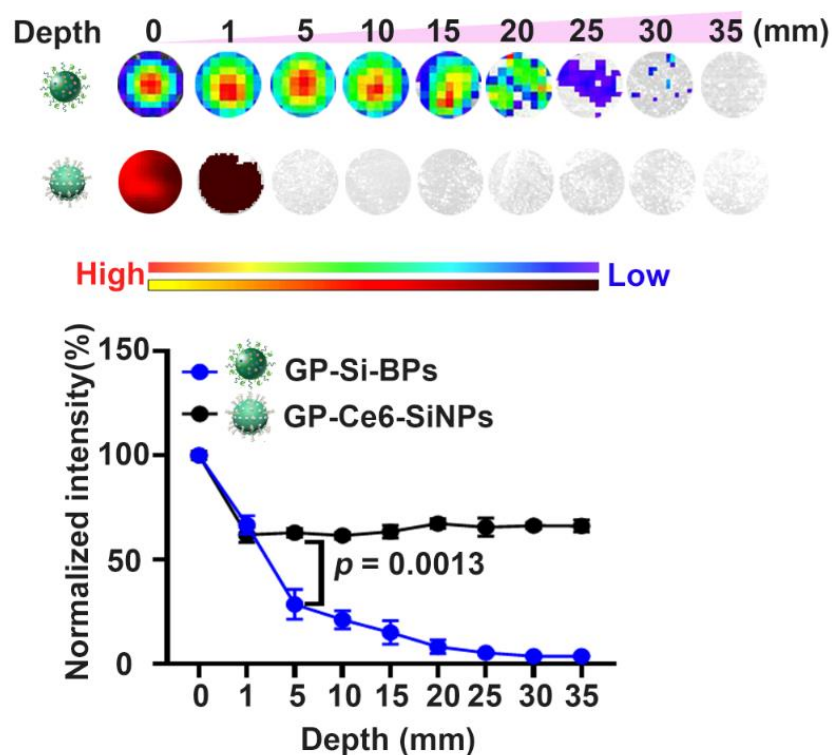

**Supplementary Fig. 9. Comparison of tissue penetration depth between GP-Si-BPs and GP-Ce6-SiNPs.** All imaging experiments were repeated three times with similar results. Statistical analysis was performed using a one-way ANOVA analysis (mean  $\pm$  SD,  $n = 3$ ). Error bars represent the standard deviation obtained from three independent measurements. Source data are provided as a Source data file.

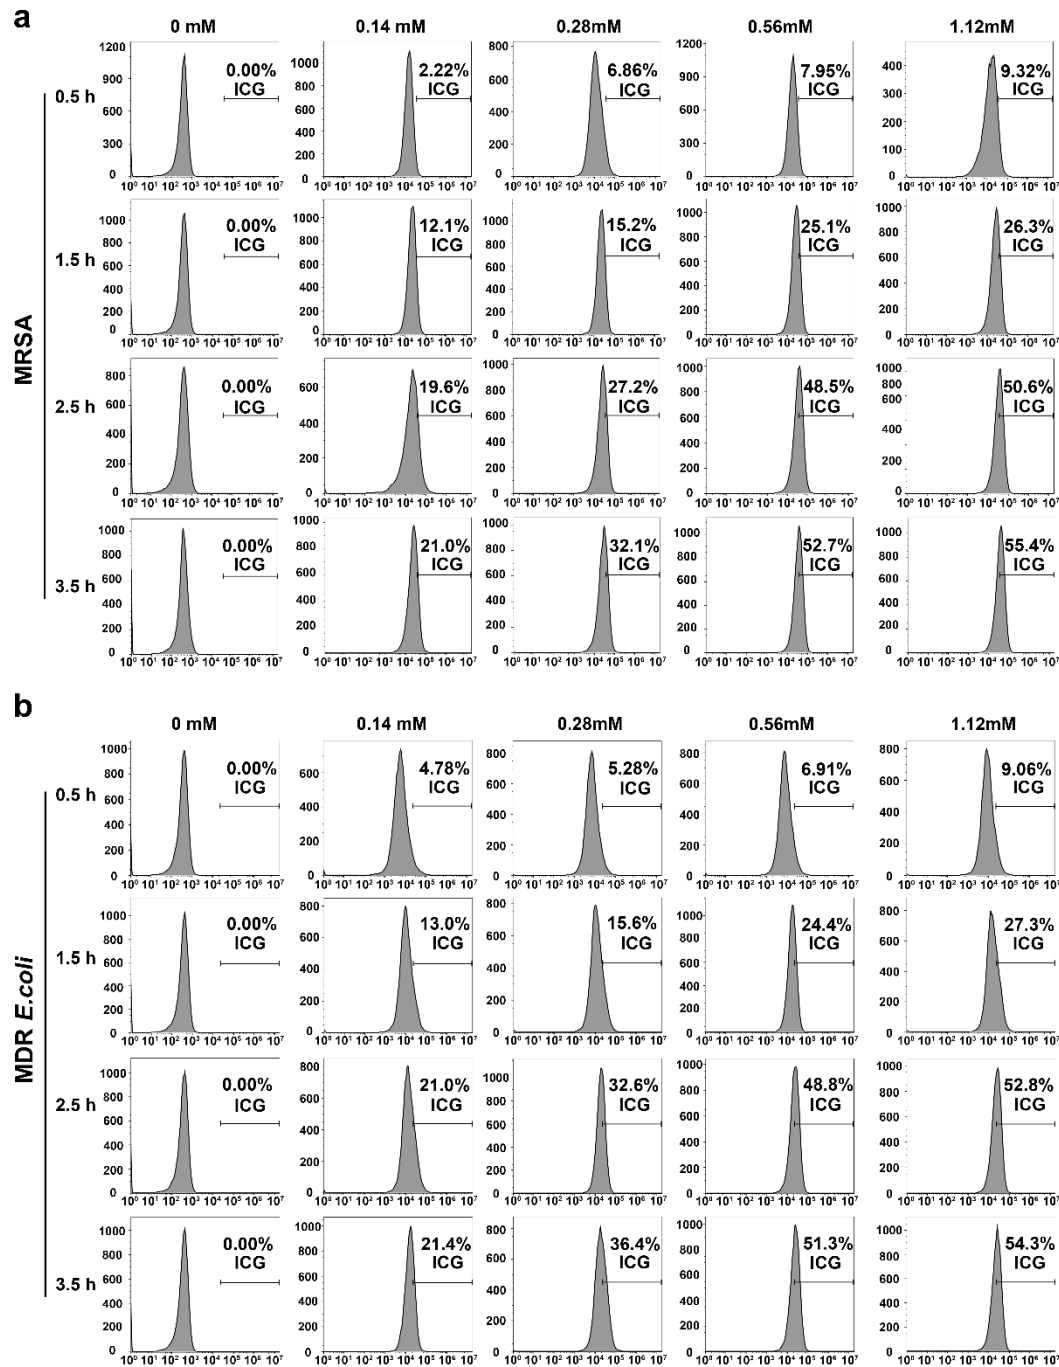

**Supplementary Fig. 10. The effects of GP concentration and incubation time on the uptake of GP-Si-BPs by bacteria. a,** Flow cytometry analysis of MRSA co-incubated with GP-Si-BPs with GP concentration (0, 0.14, 0.28, 0.56, 1.12 mM) at 37 °C for 0.5 h, 1.5 h, 2.5 h and 3.5 h, respectively. **b,** Flow cytometry analysis of MDR *E. coli* co-incubated with GP-Si-BPs with GP concentration (0, 0.14, 0.28, 0.56, 1.12 mM) at 37 °C for 0.5 h, 1.5 h, 2.5 h and 3.5 h, respectively.

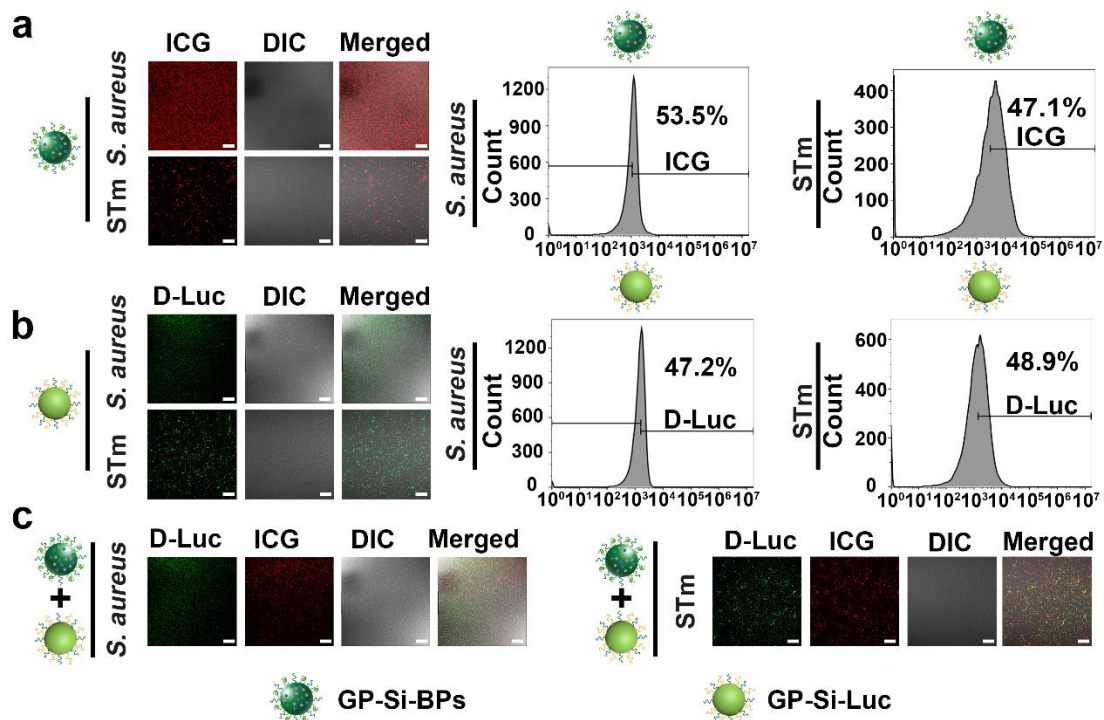

**Supplementary Fig. 11. CLSM images of bacteria treated with GP-Si-BPs, GP-Si-Luc or GP-Si-BPs + GP-Si-Luc. a**, Confocal images of *S. aureus* or *Salmonella typhimurium* (STm) after the incubation with 0.06 mM GP-Si-BPs and corresponding flow cytometry analysis of uptake rates. **b**, Confocal images of *S. aureus* or STm after the incubation with 0.06 mM GP-Si-Luc and corresponding flow cytometry analysis of uptake rates. **c**, Confocal images of *S. aureus* or STm after the incubation with 0.06 mM GP-Si-BPs + GP-Si-Luc. After incubation, the treated bacteria were rinsed with PBS buffer for several times. The bacterial cell concentration is  $\sim 10^7$  CFU. Scale bar, 25  $\mu$ m. All imaging experiments were repeated three times with similar results.

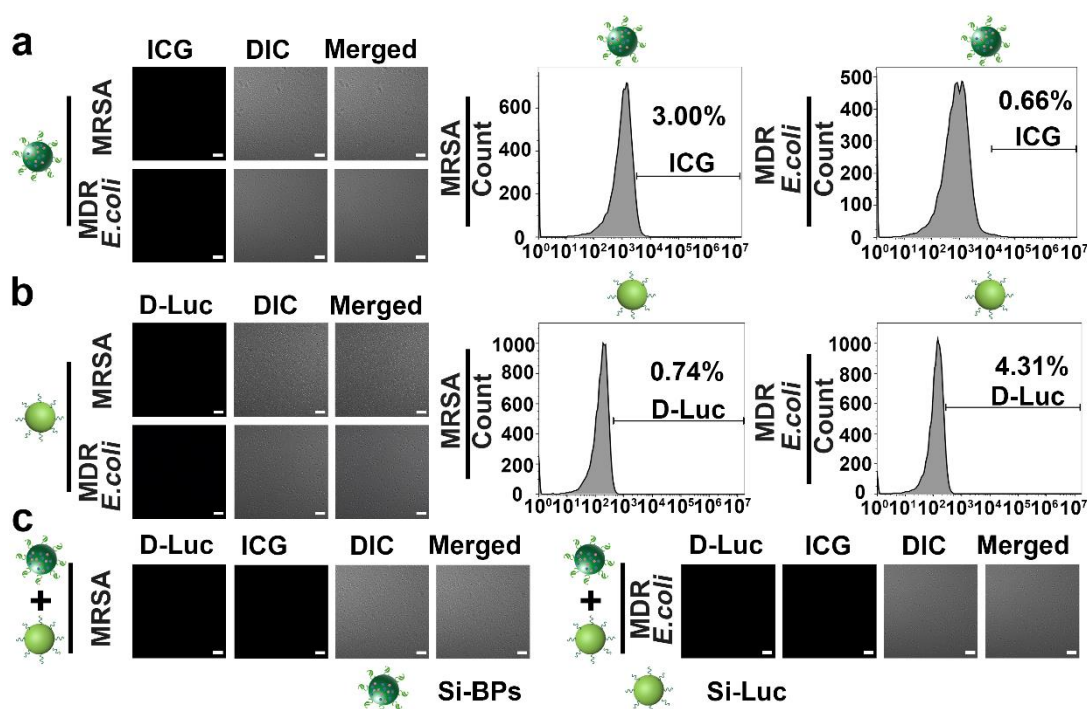

**Supplementary Fig. 12. CLSM images of bacteria treated with Si-BPs, Si-Luc or Si-BPs + Si-Luc. a,** Confocal images of MRSA or MDR *E. coli* after the incubation with 0.06 mM Si-BPs and corresponding flow cytometry analysis of uptake rates. **b,** Confocal images of MRSA or MDR *E. coli* after the incubation with 0.06 mM Si-Luc and corresponding flow cytometry analysis of uptake rates. **c,** Confocal images of MRSA or MDR *E. coli* after the incubation with 0.06 mM Si-BPs + Si-Luc. After incubation, the treated bacteria were rinsed with PBS buffer for several times. The bacterial cell concentration is  $\sim 10^7$  CFU. Scale bar, 25  $\mu$ m. All imaging experiments were repeated three times with similar results.

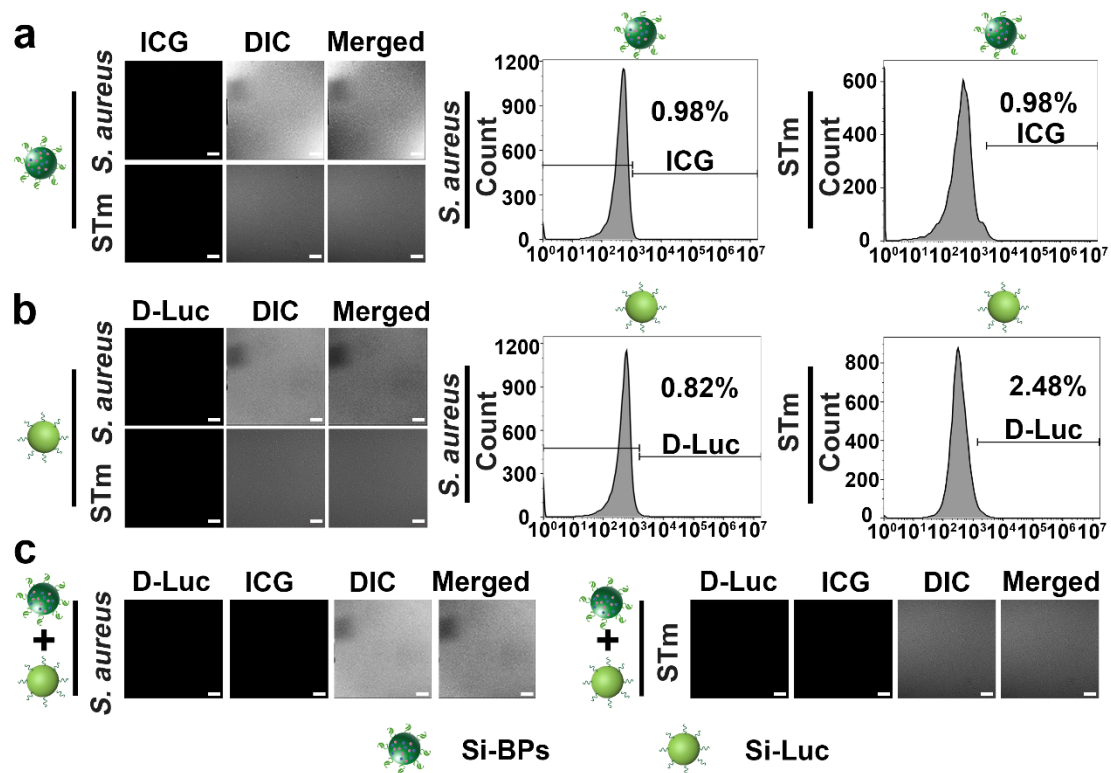

**Supplementary Fig. 13. CLSM images of bacteria treated with Si-BPs, Si-Luc and Si-BPs + Si-Luc. a,** Confocal images of *S. aureus* or *Salmonella typhimurium* (STm) after the incubation with 0.06 mM Si-BPs and corresponding flow cytometry analysis of uptake rates. **b,** Confocal images of *S. aureus* or STm after the incubation with 0.06 mM Si-Luc and corresponding flow cytometry analysis of uptake rates. **c,** Confocal images of *S. aureus* or STm after the incubation with 0.06 mM Si-BPs + Si-Luc. After incubation, the treated bacteria were rinsed with PBS buffer for several times. The bacterial cell concentration is  $\sim 10^7$  CFU. Scale bar, 25  $\mu$ m. All imaging experiments were repeated three times with similar results.

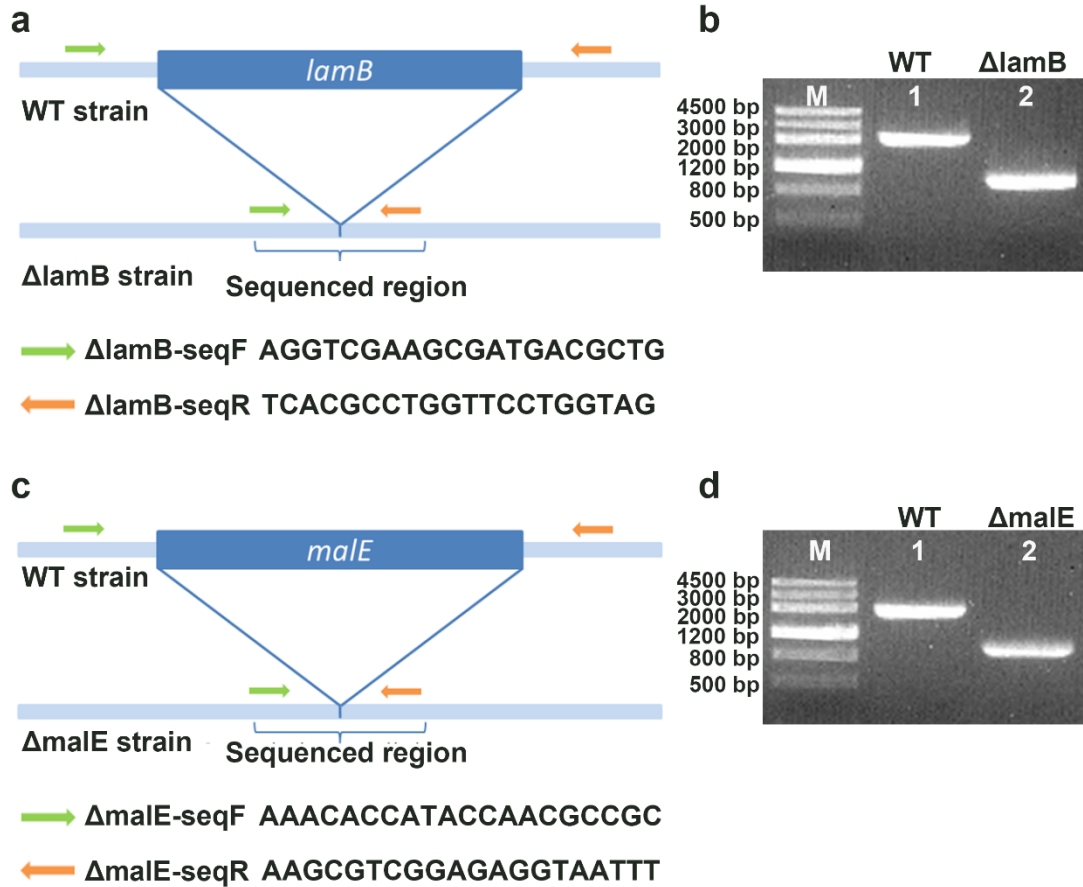

**Supplementary Fig. 14. Confirmation of the successful construction of Δ*lamB* and Δ*maleE*.** **a**, A scheme illustrating the location of primers of Δ*lamB*-seqF and Δ*lamB*-seqR relative to *lamB*. **b**, Confirmation of *lamB* knockout by PCR. All imaging experiments were repeated three times with similar results. **c**, A scheme illustrating the location of primers of Δ*maleE*-seqF and Δ*maleE*-seqR relative to *maleE*. **d**, Confirmation of *maleE* knockout by PCR. All imaging experiments were repeated three times with similar results.

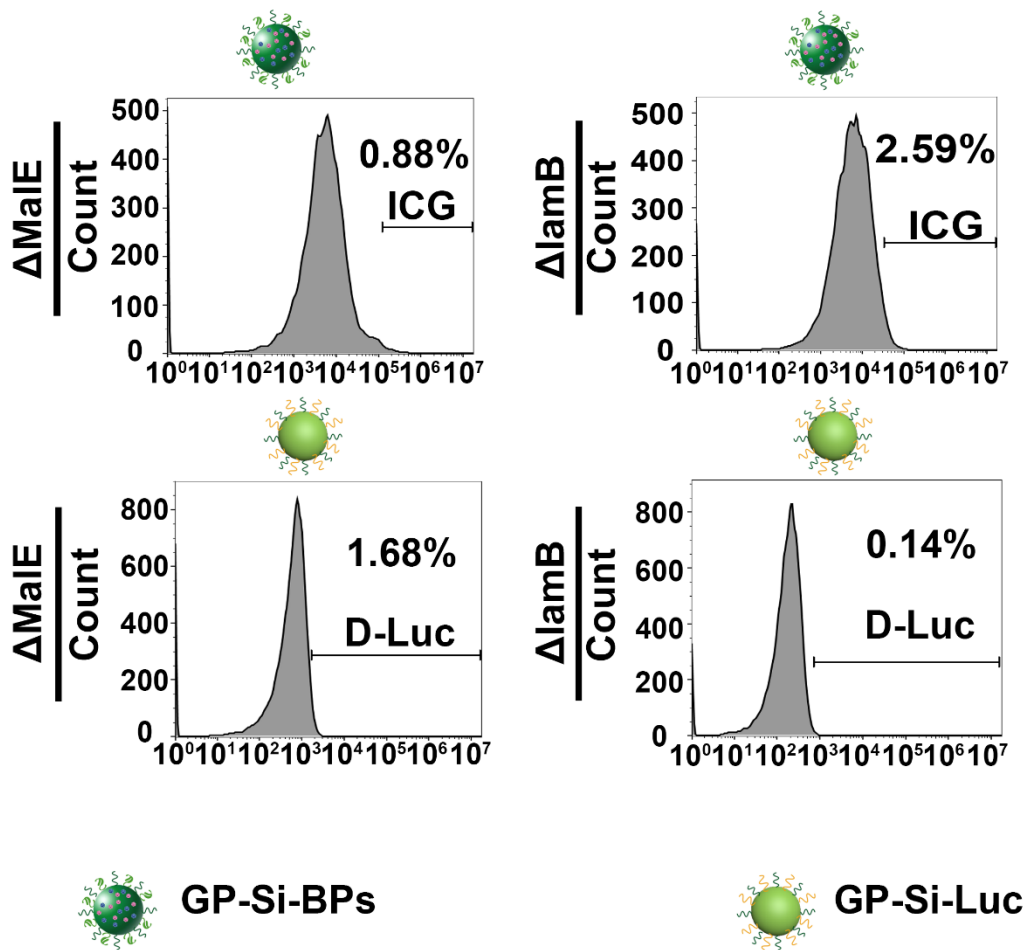

**Supplementary Fig. 15.** Flow cytometry analysis of uptake rates of bacteria mutants of  $\Delta$ lamB and  $\Delta$ MaIE after incubation with 0.06 mM GP-Si-BPs or GP-Si-Luc. The bacterial cell concentration is  $\sim 10^7$  CFU.



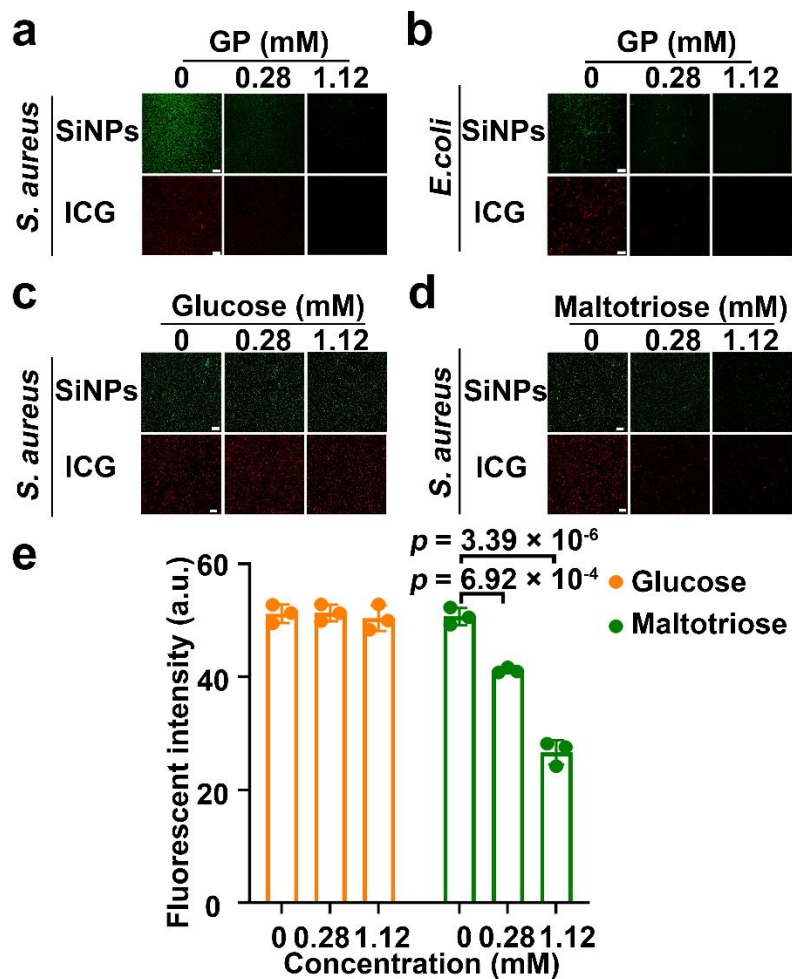

**Supplementary Fig. 16. CLSM images of the GP-Si-BPs-treated bacteria after treatments of pure GP, glucose and maltotriose with different concentrations.** **a-b**, Confocal fluorescence images of *S. aureus* (**a**) or *E. coli* (**b**) incubated with GP with different concentrations (e.g., 0, 0.28, 1.12 mM) for 5 min and then incubated with 0.06 mM GP-Si-BPs for another 2.5 h. **c-d**, Confocal fluorescence images of *S. aureus* incubated with glucose (**c**) or maltotriose (**d**) with different concentrations (e.g., 0, 0.28, 1.12 mM) for 5 min and then incubated with 0.06 mM GP-Si-BPs for another 2.5 h. **e**, Corresponding histograms of fluorescent intensity images of *S. aureus* incubated with glucose or maltotriose. The bacterial cell concentration is  $\sim 10^7$  CFU. Scale bar, 25  $\mu$ m (mean  $\pm$  SD,  $n = 3$ ). Statistical analysis was performed using a one-way ANOVA analysis. Error bars represent the standard deviation obtained from three independent measurements. All imaging experiments were repeated three times with similar results. Source data are provided as a Source data file.

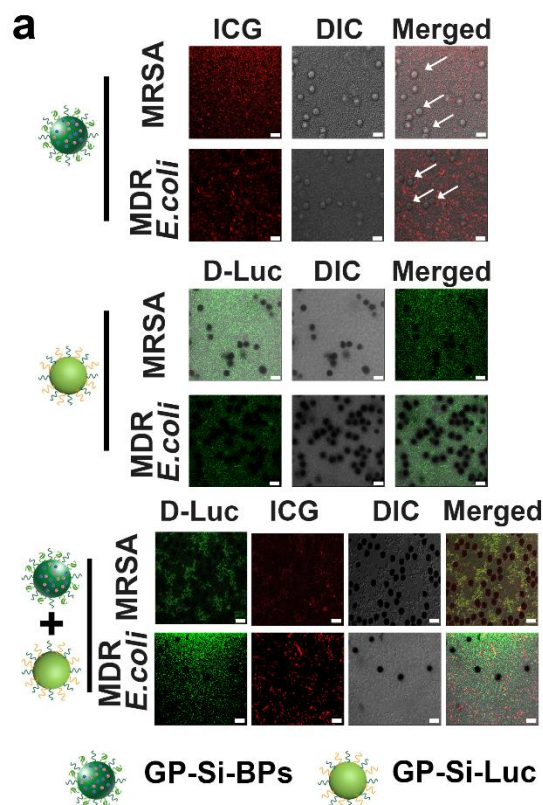

**Supplementary Fig. 17. Evaluation of the selectivity of GP-Si-BPs and GP-Si-Luc for bacteria over mammalian cells. a,** Confocal fluorescence images of pure human blood, the mixture of human blood and MRSA or MDR *E. coli* after incubation with GP-Si-BPs, GP-Si-Luc and GP-Si-BPs + GP-Si-Luc. Arrows indicate red blood cells (RBCs). Scale bar, 25 μm. All imaging experiments were repeated three times with similar results.

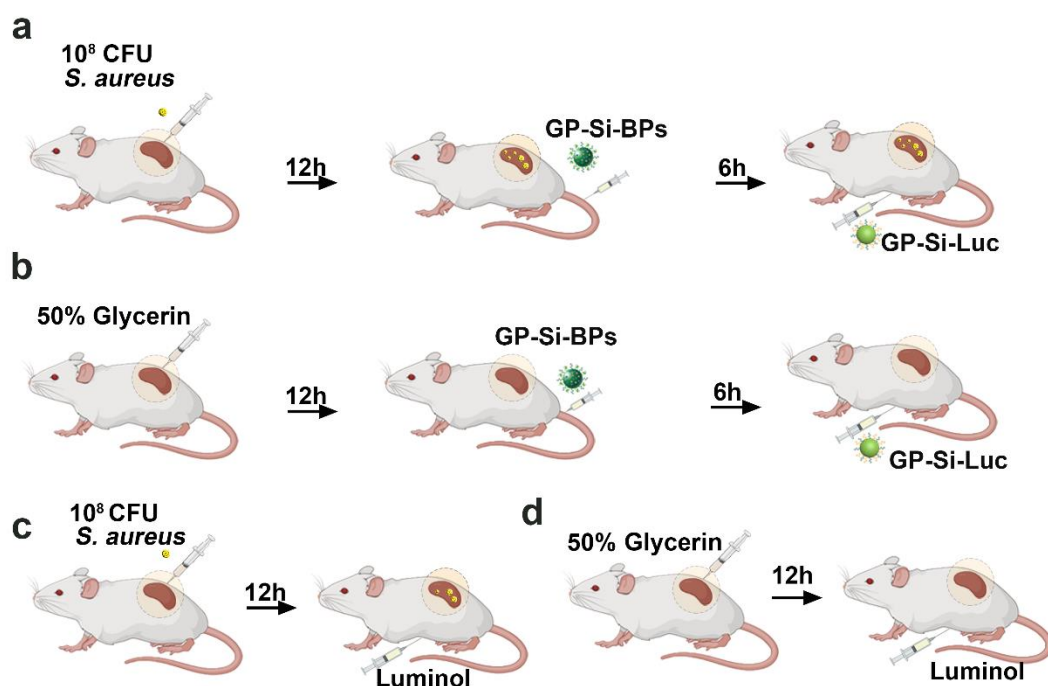

**Supplementary Fig. 18. schemes illustrating *in vivo* imaging in mouse models of nephritis based on the proposed Trojan horse strategy.** **a**, A scheme illustrating the bioluminescent imaging of *S. aureus*-induced nephritis in mice by using the Trojan BLI probes. The treated mice (Female, 6-8 weeks old,  $n = 3$ ) were intravenously injected with 200  $\mu$ L of 0.06 mM GP-Si-BPs or Si-BPs at 12-h post-injection of 25  $\mu$ L of *S. aureus*. After 6 hours, these mice were intraperitoneally injected with GP-Si-Luc or Si-Luc (0.06 mM, 200  $\mu$ L), followed by *in vivo* imaging by using an optical imaging system (IVIS Lumina III) at 15-min post-injection. The actual *S. aureus* concentration at the infection site during imaging was  $\sim 1.0 \times 10^8$  CFU, which was determined through kidney tissue harvesting, homogenization, and culturing with CFU count. **b**, A scheme illustrating the bioluminescent imaging of 50% glycerin-induced nephritis in mice by using the Trojan BLI probes. The mice (Female, 6-8 weeks old,  $n = 3$ ) were *in situ* injected with 25  $\mu$ L 50% (v/v) glycerin, followed by intravenous injection of 200  $\mu$ L of 0.06 mM GP-Si-BPs at 12-h post-injection. Six hours later, GP-Si-Luc (0.06 mM) were intraperitoneally injected into these mice, and the infected sites were imaged by an *in vivo* optical imaging system (IVIS Lumina III) at 15-min post-injection. **c**, A scheme illustrating the luminescent imaging of *S. aureus*-induced nephritis in mice by using luminol. **d**, A scheme illustrating the luminescent imaging of 50% glycerin-induced

nephritis in mice by using luminol. The 200  $\mu$ L of 282 mM luminol were intraperitoneally injected into *S. aureus* nephritis-bearing mice or glycerin nephritis-bearing mice, followed by imaging by using an *in vivo* optical imaging system (IVIS Lumina III) at 10-min post-injection.

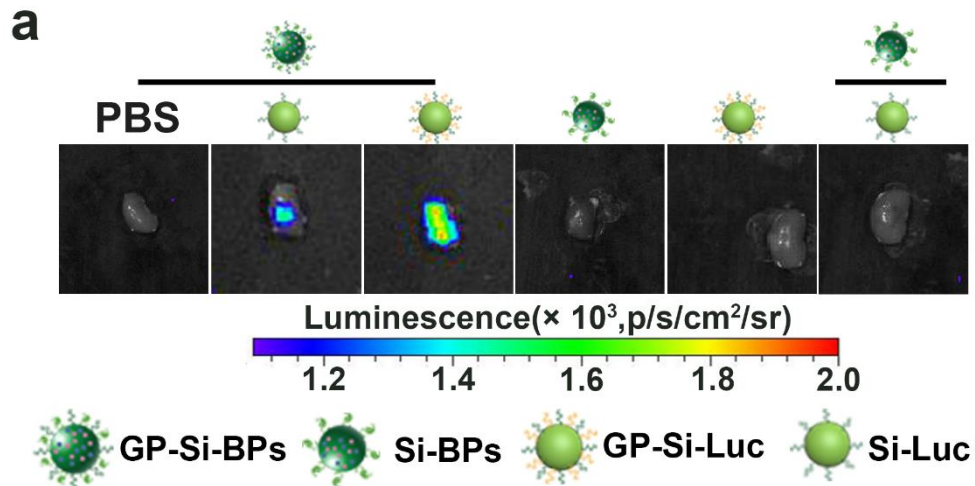

**Supplementary Fig. 19.** *Ex vivo* bioluminescence imaging of kidney tissues isolated from *S. aureus* ( $\sim 1.0 \times 10^8$  CFU) nephritis-bearing mice with different treatments as indicated. All imaging experiments were repeated three times with similar results.

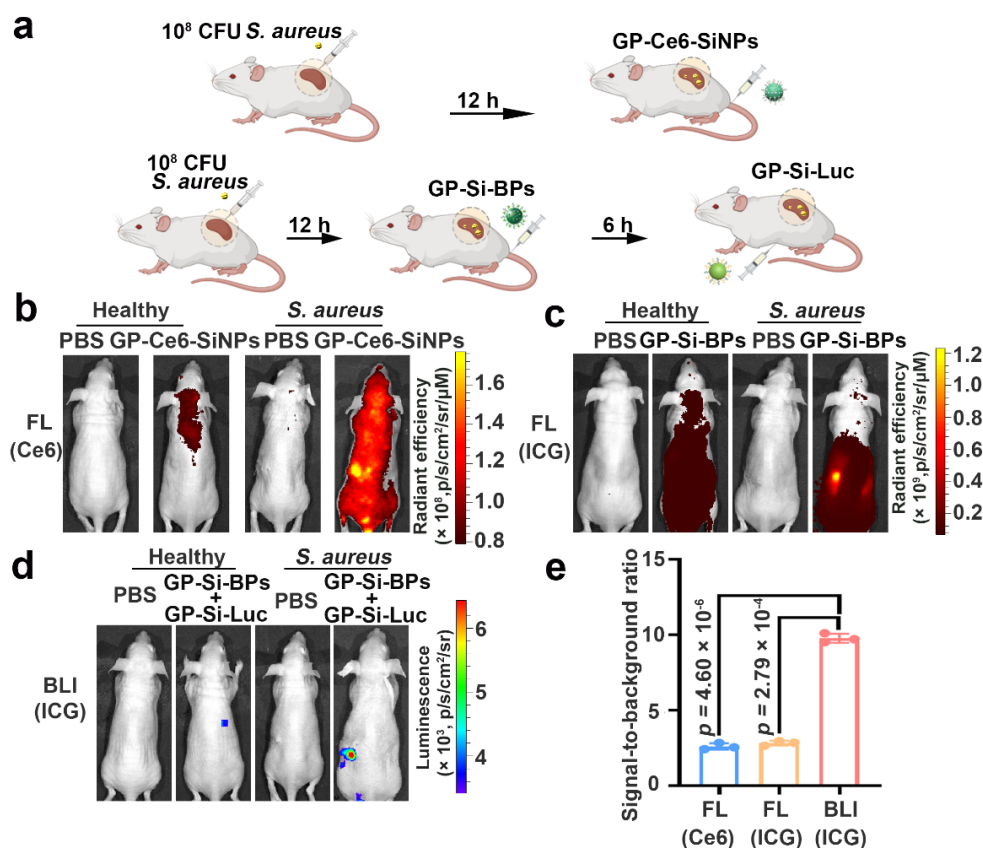

**Supplementary Fig. 20. Comparison of GP-Ce6-SiNPs system (simply excitation of Ce6), Trojan BLI system (GP-Si-BPs + GP-Si-Luc), and ICG-based NIR emission imaging (simply excitation of ICG in GP-Si-BPs) in the imaging of *S. aureus*-induced nephritis.** **a**, A scheme illustrating the optical imaging of *S. aureus*-induced nephritis in mice by using GP-Ce6-SiNPs system, Trojan BLI system or ICG-based NIR emission imaging. **b**, Fluorescence imaging of healthy mice and *S. aureus* nephritis-bearing mice treated with GP-Ce6-SiNPs or not (excitation: 460 nm, emission: 670 nm). **c**, Fluorescence imaging of healthy mice and *S. aureus* nephritis-bearing mice treated with GP-Si-BPs or not (excitation: 780 nm, emission: 845 nm). **d**, Bioluminescence imaging of healthy mice and *S. aureus* nephritis-bearing mice treated with GP-Si-BPs + GP-Si-Luc or not (emission: 845 nm). **e**, Corresponding signal-to-noise ratios obtained by GP-Ce6-SiNPs system, ICG-based NIR emission imaging and Trojan BLI system in the imaging of *S. aureus*-induced nephritis in mice (mean  $\pm$  SD,  $n = 3$ ). Statistical analysis was performed using a one-way ANOVA analysis. Error bars represent the standard deviation obtained from three independent measurements. Source data are provided as a Source data file.

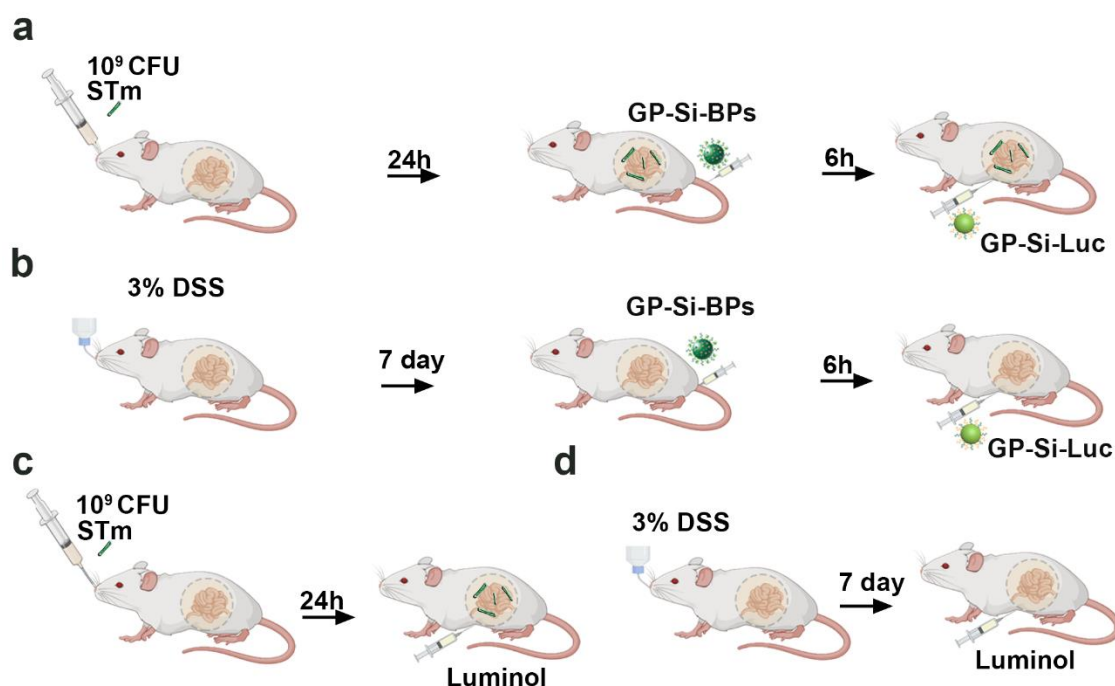

**Supplementary Fig. 21. Schemes illustrating *in vivo* imaging in mouse models of colitis based on the proposed Trojan horse strategy.** **a**, A scheme illustrating the bioluminescent imaging of STm-induced colitis in mice based on the Trojan BLI probes. The 100  $\mu$ L STm were oral administrated into the mice (Female, 6-8 weeks old,  $n = 3$ ), and 24 hours later, the treated mice were intravenously injected with 200  $\mu$ L of 0.06 mM GP-Si-BPs or Si-BPs. At 6-h post-injection, the treated mice were intraperitoneally injected with GP-Si-Luc or Si-Luc (0.06 mM), followed by BLI by using an *in vivo* optical imaging system (IVIS Lumina III) at 15-min post-injection of substrates. The actual amount of STm at the infection site during imaging was determined as  $\sim 1.0 \times 10^9$  CFU, which was obtained through intestinal tissue harvesting, homogenization, and culturing with CFU count. **b**, A scheme illustrating the bioluminescent imaging of DSS-induced colitis in mice based on the Trojan BLI probes. **c**, A scheme illustrating the luminescent imaging of STm-induced colitis in mice based on luminol. **d**, A scheme illustrating the luminescent imaging of DSS-induced colitis in mice based on luminol. The 200  $\mu$ L of 282 mM luminol were intraperitoneally injected into STm colitis-bearing mice or DSS colitis-bearing mice, followed by imaging by using an *in vivo* optical imaging system (IVIS Lumina III) at 10-min post-injection.



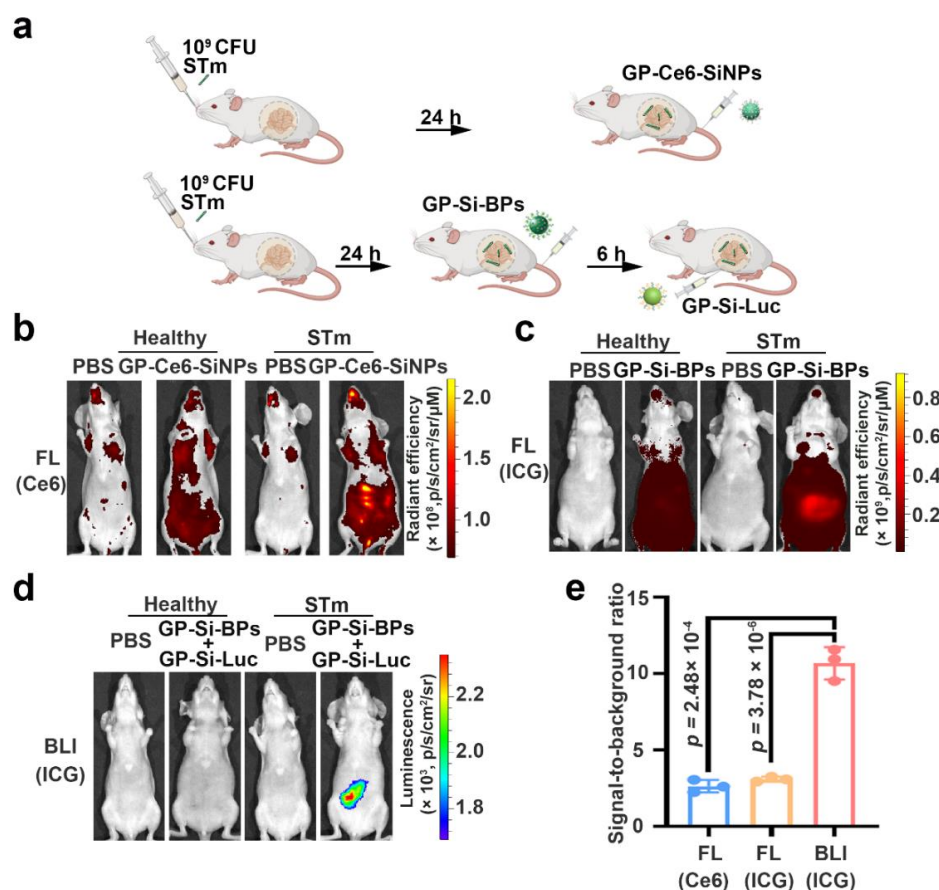

**Supplementary Fig. 22. Comparison of GP-Ce6-SiNPs system (simply excitation of Ce6), Trojan BLI system (GP-Si-BPs + GP-Si-Luc), and ICG-based NIR emission imaging (simply excitation of ICG in GP-Si-BPs) in the imaging of STm-induced colitis.** **a**, A scheme illustrating the luminescent imaging of STm-induced colitis in mice by using GP-Ce6-SiNPs system, Trojan BLI system or ICG-based NIR emission imaging. **b**, Fluorescence imaging of healthy mice and STm colitis-bearing mice treated with GP-Ce6-SiNPs or not (excitation: 460 nm, emission: 670 nm). **c**, Fluorescence imaging of healthy mice and STm colitis-bearing mice treated with GP-Si-BPs or not (excitation: 780 nm, emission: 845 nm). **d**, Bioluminescence imaging of healthy mice and STm colitis-bearing mice treated with GP-Si-BPs + GP-Si-Luc or not (emission: 845 nm). **e**, Corresponding signal-to-noise ratios obtained by GP-Ce6-SiNPs system, ICG-based NIR emission imaging and Trojan BLI system in the imaging of STm-induced colitis in mice (mean  $\pm$  SD,  $n = 3$ ). Statistical analysis was performed using a one-way ANOVA analysis. Error bars represent the standard deviation obtained from three independent measurements. Source data are provided as a Source data file.



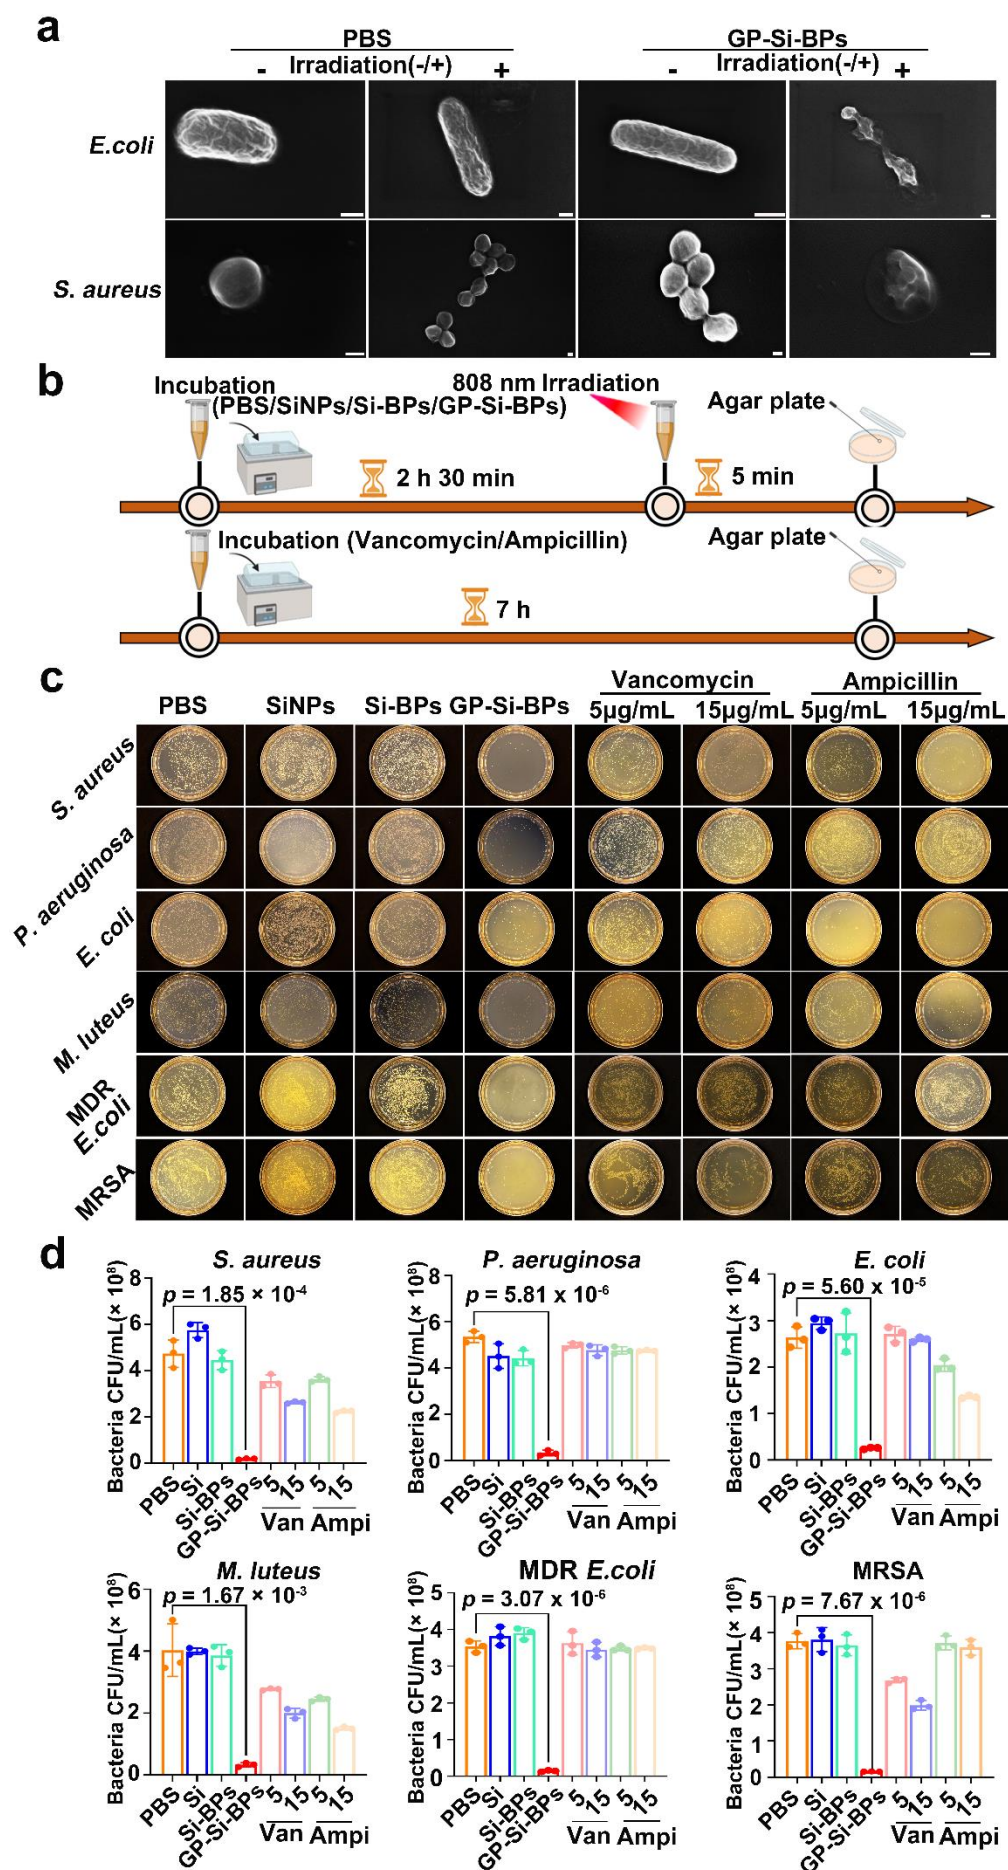

**Supplementary Fig. 23. *In vitro* antibacterial activity based on the Trojan BLI probes.** **a**, SEM images of *E. coli* or *S. aureus* treated with PBS or GP-Si-BPs with or without irradiation. Scale bar, 200 nm. **b**, A scheme illustrating the antibacterial evaluation of the developed strategy. **c**, Photographs of agar plates of *S. aureus*, *P. aeruginosa*, *E. coli*, *M. luteus*, multidrug-resistant *Escherichia coli* (MDR *E. coli*) and multidrug-resistant *Staphylococcus aureus* (MRSA) treated by PBS, SiNPs, Si-BPs, GP-Si-BPs (with irradiation of 808-nm laser, 1.0 W cm<sup>-2</sup>, 5 min), vancomycin or ampicillin (with various concentration) and **d**, corresponding histograms of bacterial amounts (mean  $\pm$  SD, n = 3). All imaging experiments were repeated three times with similar results. Statistical analysis was performed using a one-way ANOVA analysis. Source data are provided as a Source data file.

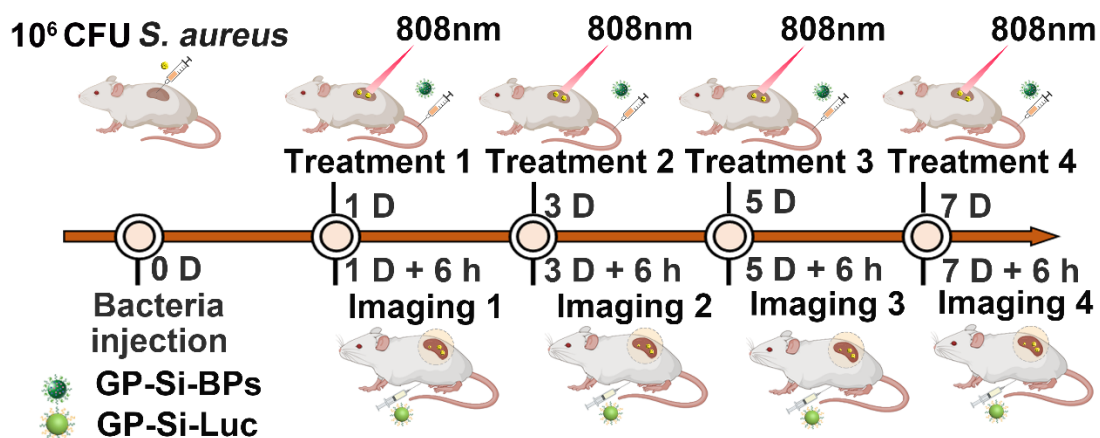

**Supplementary Fig. 24. A scheme illustrating Trojan BLI strategy for therapy and imaging of bacterial nephritis-bearing mice.** At 6-h post-injection of  $1.0 \times 10^6$  CFU of *S. aureus*, the infected mice (Female, 6-8 weeks old,  $n = 3$ ) were intravenously injected with 200  $\mu$ L of 0.06 mM GP-Si-BPs or PBS buffer on day 1 (Treatment 1), day 3 (Treatment 2), day 5 (Treatment 3) and day 7 (Treatment 4) respectively, and photothermal treatment (PTT) was performed under 808-nm laser irradiation 6 hours after each drug injection. And the photothermal treatment lasted for 5 minutes. Afterwards, mice were intraperitoneally injected with GP-Si-Luc after each irradiation for imaging to assay the therapeutic effect *in vivo*.

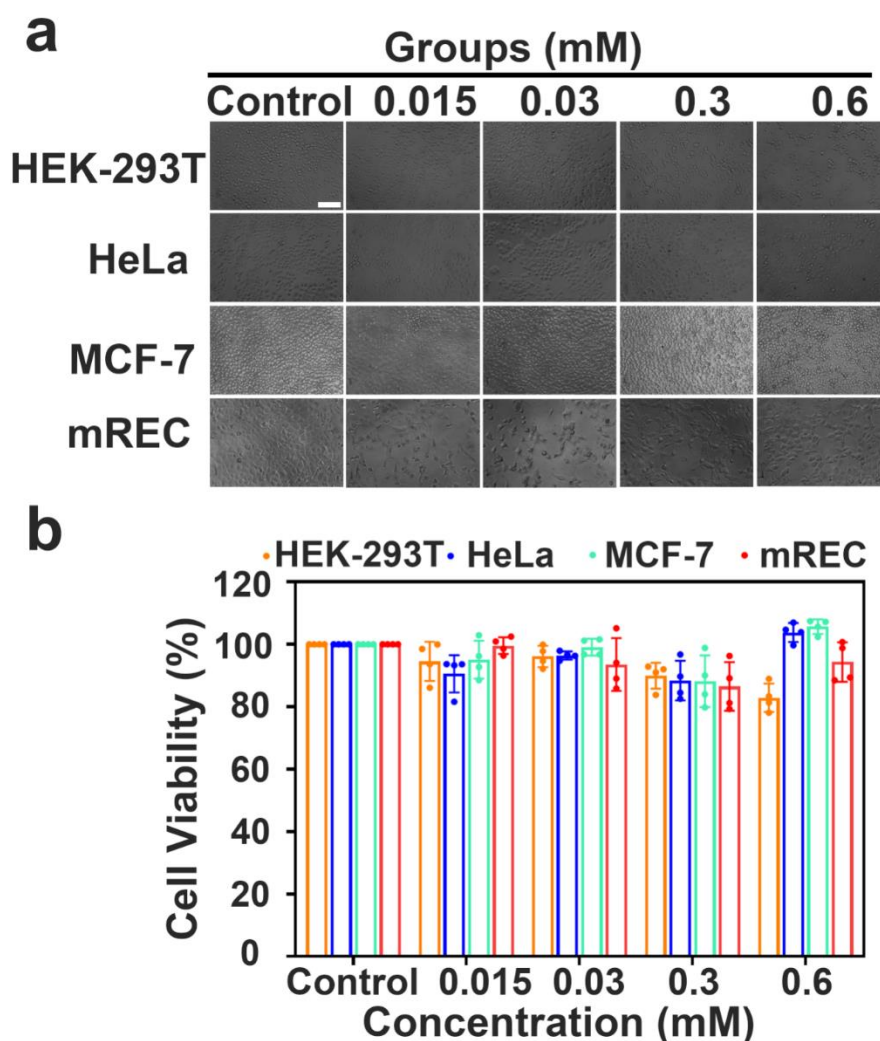

**Supplementary Fig. 25. Evaluation of cytotoxicity of Trojan BLI probes. a,** Morphology of HEK-293T, HeLa, MCF-7 and mREC cells treated with GP-Si-BPs + GP-Si-Luc (0.06 mM) for 24 h, respectively. **b,** Cell viability of HEK-293T, HeLa, MCF-7 and mREC cells treated with GP-Si-BPs + GP-Si-Luc with different dosages for 24 h, respectively (mean  $\pm$  SD,  $n = 4$ ). Scale bar, 50  $\mu$ m. All imaging experiments were repeated four times with similar results. Source data are provided as a Source data file.



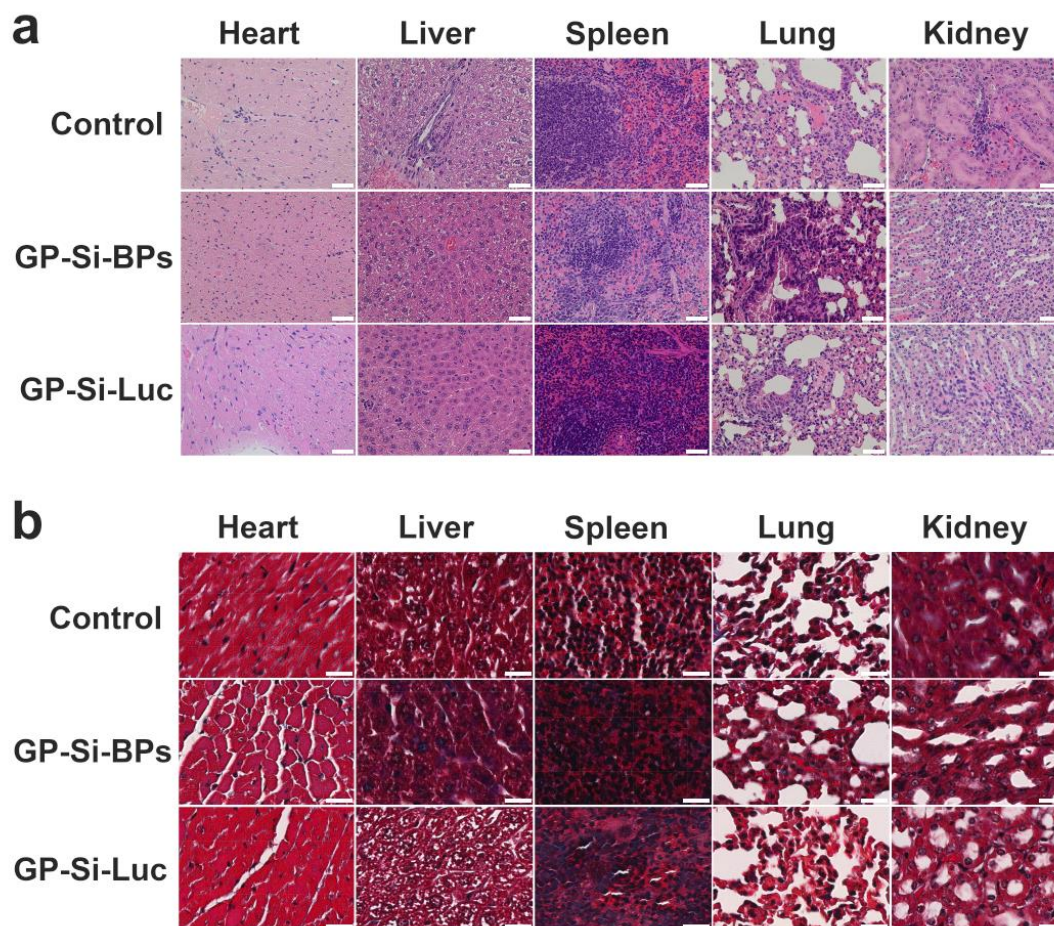

**Supplementary Fig. 26.** Representative histological images of major organs of healthy mice treated with 0.06 mM GP-Si-BPs or GP-Si-Luc for 24 h. **a**, H&E staining of different organs (heart, liver, spleen, lung and kidney) harvested from treated mice. Scale bar, 20  $\mu$ m. All imaging experiments were repeated three times with similar results. **b**, Masson's trichrome staining of different organs (heart, liver, spleen, lung and kidney) harvested from treated mice. Scale bar, 20  $\mu$ m. All imaging experiments were repeated three times with similar results.

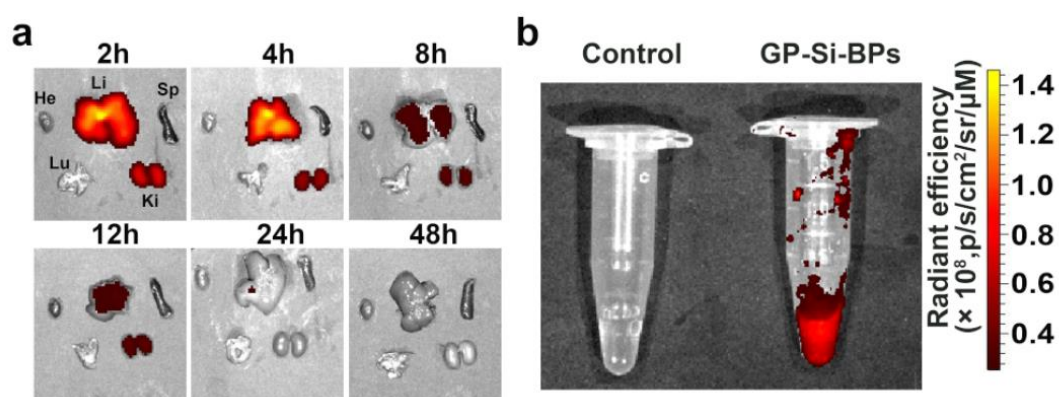

**Supplementary Fig. 27. a**, *Ex vivo* fluorescence imaging of organs resected from healthy mice after intravenous injection of 0.06 mM GP-Si-BPs at different time points. First row (from left to right): heart (He), liver (Li), spleen (Sp); second row (from left to right): lung (Lu), and kidney (Ki). **b**, *Ex vivo* fluorescence imaging of urine from healthy mice treated with PBS (control) or 0.06 mM GP-Si-BPs after 24 h post-injection.

**Supplementary Table 1.** Comparison of the features of glucose polymer (GP) modified imaging or therapeutic nanoagents.

| Refs.                                                      | Features                                                                      |                                   |                                                                                                             |
|------------------------------------------------------------|-------------------------------------------------------------------------------|-----------------------------------|-------------------------------------------------------------------------------------------------------------|
|                                                            | Agents composition                                                            | Mechanisms of entry into bacteria | Functions                                                                                                   |
| <i>Nat. Commun.</i> <b>10</b> , 4057 (2019)                | GP and chlorin e6 (Ce6) modified silicon nanoparticles (SiNPs)                | ABC transporter pathway           | Fluorescence imaging and photodynamic killing of Gram-negative and Gram-positive bacteria                   |
| <i>Nat. Commun.</i> <b>13</b> , 1255 (2022)                | GP and Ce6 modified gold nanoparticles (AuNPs)                                | ABC transporter pathway           | Photoacoustic imaging and photodynamic and photothermal killing of Gram-negative and Gram-positive bacteria |
| <i>Nat. Commun.</i> <b>13</b> , 5127 (2022)                | GP and indocyanine green (ICG) modified SiNPs                                 | ABC transporter pathway           | A bacteria-based drug delivery system for glioblastoma photothermal immunotherapy                           |
| <i>Angew. Chem. Int. Ed.</i> <b>61</b> , e202208422 (2022) | GP and ICG modified SiNPs, AuNPs or carbon dots (CDs)                         | ABC transporter pathway           | A bacteria-based drug delivery system for photothermal programmable destruction of deep tumor tissues       |
| This work                                                  | GP, luciferase, Cy5 and ICG-modified SiNPs, GP and D-luciferin-modified SiNPs | ABC transporter pathway           | Bioluminescence imaging and photothermal killing of Gram-negative and Gram-positive bacteria                |

**Supplementary Table 2.** Blood biochemical analysis of health mice treated with PBS, GP-Si-Luc or GP-Si-BPs for 24 h.

| Analysis index                   | PBS   |                    | GP-Si-Luc |                    | GP-Si-BPs |                    |
|----------------------------------|-------|--------------------|-----------|--------------------|-----------|--------------------|
|                                  | Mean  | Standard deviation | Mean      | Standard deviation | Mean      | Standard deviation |
| Albumin and globulin ratio       | 2.15  | 0.11               | 2.18      | 0.13               | 1.81      | 0.12               |
| Alanine aminotransferase (U/L)   | 14.04 | 0.84               | 18.59     | 1.19               | 13.26     | 3.40               |
| Aspartate aminotransferase (U/L) | 45.53 | 7.49               | 46.43     | 10.08              | 47.19     | 7.08               |
| Alkaline phosphatase (U/L)       | 46.88 | 13.81              | 46.20     | 4.35               | 52.66     | 3.52               |
| Urea (mmol/L)                    | 10.64 | 0.10               | 10.51     | 0.26               | 10.61     | 0.33               |
| Creatinine ( $\mu$ mol/L)        | 6.47  | 0.63               | 9.06      | 1.78               | 8.04      | 0.67               |
| Total protein (mmol/L)           | 18.54 | 0.56               | 17.70     | 0.45               | 18.70     | 0.70               |
| Albumin (g/L)                    | 12.66 | 0.34               | 12.12     | 0.09               | 12.02     | 0.17               |
| Globulin (g/L)                   | 5.89  | 0.33               | 5.58      | 0.38               | 6.68      | 0.54               |



**Supplementary Table 3.** Blood routine analysis of mice injected with PBS, GP-Si-Luc or GP-Si-BPs for 24 h.

| Analysis index                                       | PBS   |                    | GP-Si-Luc |                    | GP-Si-BPs |                    |
|------------------------------------------------------|-------|--------------------|-----------|--------------------|-----------|--------------------|
|                                                      | Mean  | Standard deviation | Mean      | Standard deviation | Mean      | Standard deviation |
| White blood cell ( $1.0 \times 10^3$ cells/ $\mu$ L) | 0.62  | 0.27               | 0.89      | 0.12               | 0.63      | 0.20               |
| Red blood cell ( $1.0 \times 10^6$ cells/ $\mu$ L)   | 1.96  | 1.56               | 1.96      | 1.24               | 8.03      | 2.12               |
| Hemoglobin (g/dL)                                    | 2.77  | 0.49               | 2.77      | 0.32               | 3.13      | 0.51               |
| Hematocrit (%)                                       | 11.53 | 2.27               | 11.30     | 1.21               | 13.17     | 2.61               |
| Mean corpuscular volume (fL)                         | 59.10 | 0.62               | 57.70     | 1.42               | 59.37     | 1.19               |
| Mean corpuscular hemoglobin (pg)                     | 14.03 | 0.38               | 14.37     | 0.32               | 14.17     | 0.55               |
| Mean corpuscular hemoglobin concentration (g/dL)     | 23.80 | 0.82               | 24.83     | 0.58               | 23.83     | 0.55               |
| Mean corpuscular hemoglobin concentration (g/dL)     | 22.53 | 0.15               | 23.03     | 0.40               | 22.37     | 0.35               |
| Cholesterol (pg)                                     | 13.27 | 0.15               | 13.27     | 0.25               | 13.23     | 0.06               |
| Red cell volume distribution width (%)               | 12.33 | 0.12               | 12.03     | 0.25               | 12.30     | 0.35               |

|                                                       |        |       |        |      |        |      |
|-------------------------------------------------------|--------|-------|--------|------|--------|------|
| Hemoglobin<br>content<br>distribution width<br>(g/dL) | 1.71   | 0.02  | 1.68   | 0.04 | 1.68   | 0.06 |
| Platelet ( $1.0 \times 10^3$<br>cells/ $\mu$ L)       | 109.33 | 13.05 | 100.00 | 8.72 | 108.33 | 4.51 |
| Mean platelet<br>volume (fL)                          | 10.13  | 0.72  | 9.13   | 0.42 | 10.03  | 0.32 |

## Supplementary Notes 1

### Calculation of FRET efficiency and BRET ratio.

FRET efficiencies between Cy5 and ICG in GP-Si-BPs were calculated according to the following equation:

$$E = 1 - F'_D/F_D \quad (1)$$

where  $F'_D$  and  $F_D$  were the donor fluorescence intensities with and without an acceptor, respectively. The optimal FRET efficiency between Cy5 and ICG was calculated to be 32% (**Fig. 3c**).

The Förster distances ( $R_0$ ) of these two steps were also calculated to be 1.03 nm according to the following equations:

$$J(\lambda) = [\int_0^\infty F_D(\lambda)\varepsilon_A(\lambda)\lambda^4 d\lambda] / [\int_0^\infty F_D(\lambda) d\lambda] \quad (2)$$

$$R_0 = 0.0211[\kappa^2 n^{-4} \Phi_D J(\lambda)]^{1/6} \quad (3)$$

where  $F_D(\lambda)$  was the area-normalized emission spectrum of donor,  $\varepsilon_A(\lambda)$  was the molar absorption spectrum of the acceptor in  $\text{M}^{-1}\text{cm}^{-1}$ ,  $\lambda$  was the wavelength in nm,  $\kappa^2$  was orientation factor ( $\kappa^2 = 2/3$  due to dynamic averaging donor-acceptor systems),  $\Phi_D$  was quantum yield of the donor, and  $n = 1.35$  was the refractive index of the surrounding medium.

## Supplementary Notes 2

### Confirmation of lamB knockout by Sanger sequencing

AAAGCCGTGATGTCCAGGTTGGAGCCAATATGTCGCTGGGTATTGCCCCGG  
AACATCTACTGCCGAGTGATATCGCTGACGTCATCCTTGAGGGTGAAGTTC  
AGGTCGTCGAGCAACTCGGCAACGAACTCAAATCCATATCCAGATCCCTT  
CCATTCGTCAAAACCTGGTGTACCGCCAGAACGACGTGGTGTGGTAGAA  
GAAGGTGCCACATTCGCTATCGGCCTGCCGCCAGAGCGTTGCCATCTGTTC  
CGTGAGGATGGCACTGCATGTCGTCGACTGCATAAGGAGCCGGGCGTTTAA  
GCACCCACAAAAACACACAAAGCCTGTACAGGTGATGTGAAAAAAGAA  
AAGCAATGACTCAGGAGATAGATAGCAAAACCTGGGCCGGATAAGGCGTT  
TACGCCGCATTCGGCAACCAACGCCTGATGCGACGCTTGCGCGTCTTATCA  
GGCCTACAACGGCTGTCAAATGTAGGCCGGATAAGGCGTTTACGCCGCATC  
CGGCATAAAAACAGGTTGTCATTATCTGAAAGGGGCGAAAGCCCCCTCTGAT  
TATCGGGTTTAGCGCGCTATTGCCTGGCTACCGCTGAGCTCCAGATTTTGAG  
GTGAAAACAATGAAAATGAATAAAAGTCTCATCGTCCTCTGTTTATCAGCA  
GGGTACTGGCAAGCGCGCCTGGAATTAGCCTTGCCGATGTAACTACGTA  
CCGCAAAACACCAGCGACGCGCCAGCCATTCCATCTGCTGCGCTGCAACA  
ACTCACCTGGACACCGGTCGATCAATCT

### **Supplementary Notes 3**

#### **Confirmation of maleE knockout by Sanger sequencing**

GCTGTACGCTCGCCATGCCCTTCTCCCTTTGTAACAACCTGTCATCGACAGC  
AACATTCATGATGGGCTGACTATGCGTCATCAGGAGATGGCTTAAATCCTCC  
ACCCCCTGGCTTTTTTATGGGGGAGGAGGCGGGAGGATGAGAACACGGCT  
TCTGTGAACTAAACCGAGGTCATGTAAGGAATTCGTGATGTTGCTTGCAA  
AAATCGTGGCGATTTTATGTGCGCATCTCCACATTACCGCCAATTCTGTAAC  
AGAGATCACACAAAGCGACGGTGGGGCGTAGGGGCAAGGAGGATGGAAA  
GAGGTTGCCGTATAAAGAACTAGAGTCCGTTTAGGTGTTTTTCACGAGCAC  
TTCACCAACAAGGACCATAGATTTGCTGTGAAATGCCGGATGCGGCGTGAA  
CGCCTTGTCCGGCCTACAAAACCGAAACGTATGTAGGCCTGATAAGACGCG  
TCAGCGTCGCATCAGGCAGTTGTTGTCTGGATAAGGCGTGAAAGCCTTATCC  
GTCCTGGAATGAGGAAGAACCCCATGGATGTCATTAAAAAGAAACATTGGT  
GGCAAAGCGACGCGCTGAAATGGTCAGTGCTAGGTCTGCTCGGCCTGCTG  
GTGGGTACCTTGTTGTTTTAATGTACGCACAAGGGGAATACCTGTTCGCCA  
TTACCACGCTGATATTGAGTTCAGCGGGGCTGTATATTTTCGCCAATCGTAA  
AGCCTACGCCTGGCGCTATGTTTACCCGGGAATGGCTGGAATGGGATTATTC  
GTCCTCTTCCCTCTGGTCTGCACCATCGCCATTGCCTTCACCA
